# Supplementary material
Source: PubMed Central journal article supplement (PMC4809041)

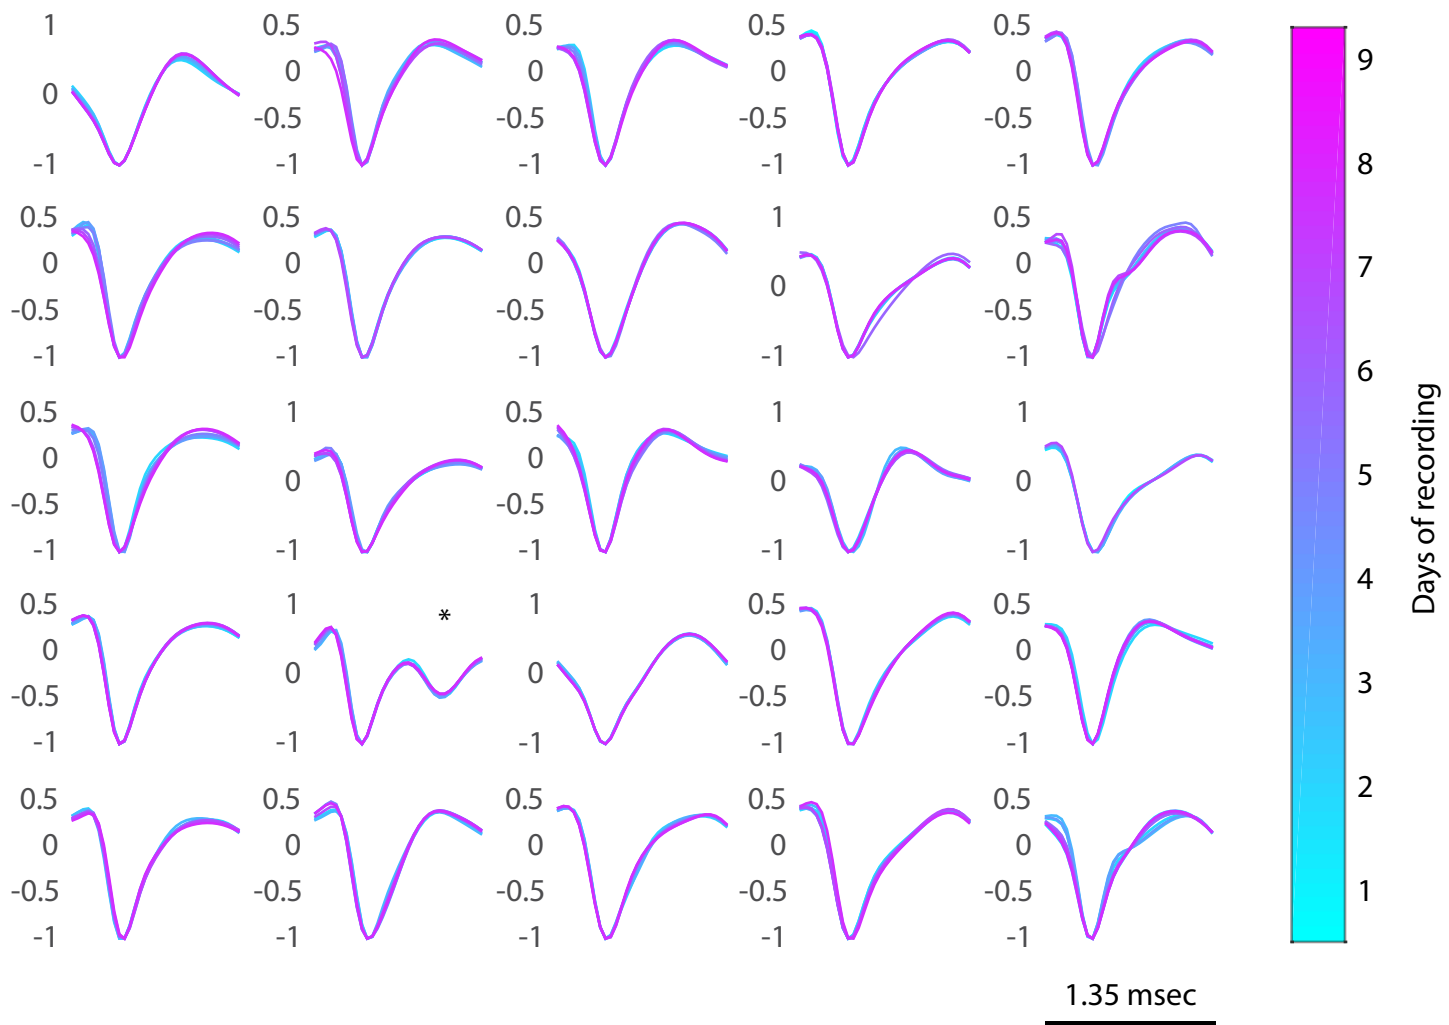

Figure S1

Supplement: NIHMS769601-supplement-1.pdf [file NIHMS769601-supplement-1.pdf]

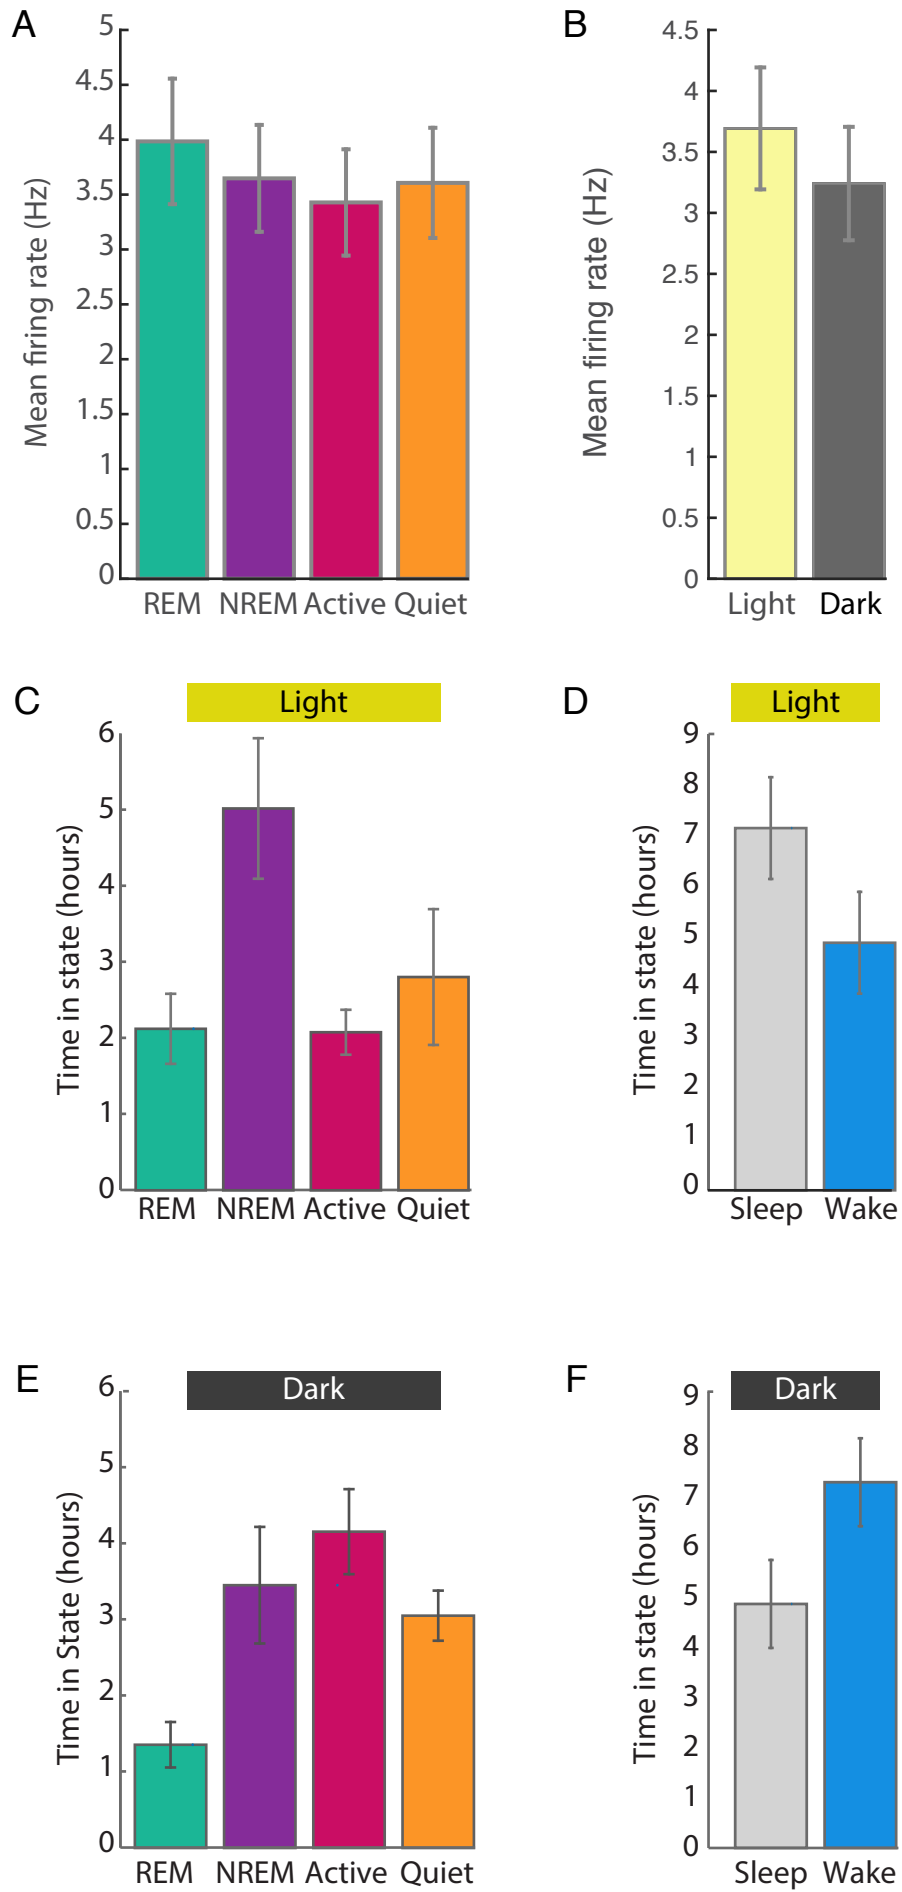

Figure S2

Supplement: NIHMS769601-supplement-2.pdf [file NIHMS769601-supplement-2.pdf]

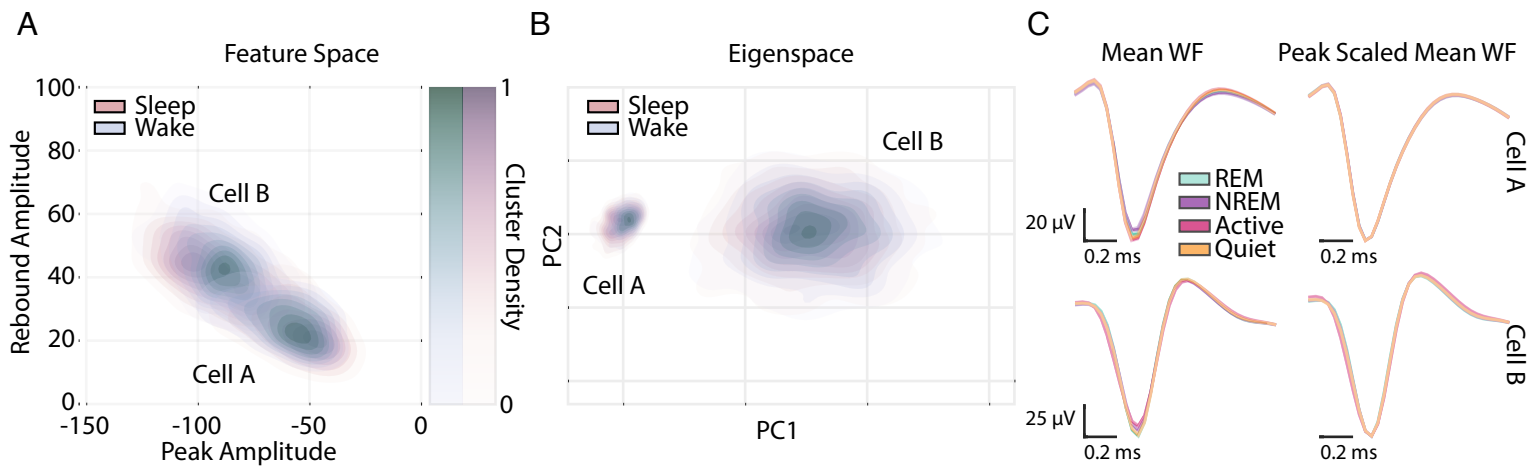

Figure S3

Supplement: NIHMS769601-supplement-3.pdf [file NIHMS769601-supplement-3.pdf]

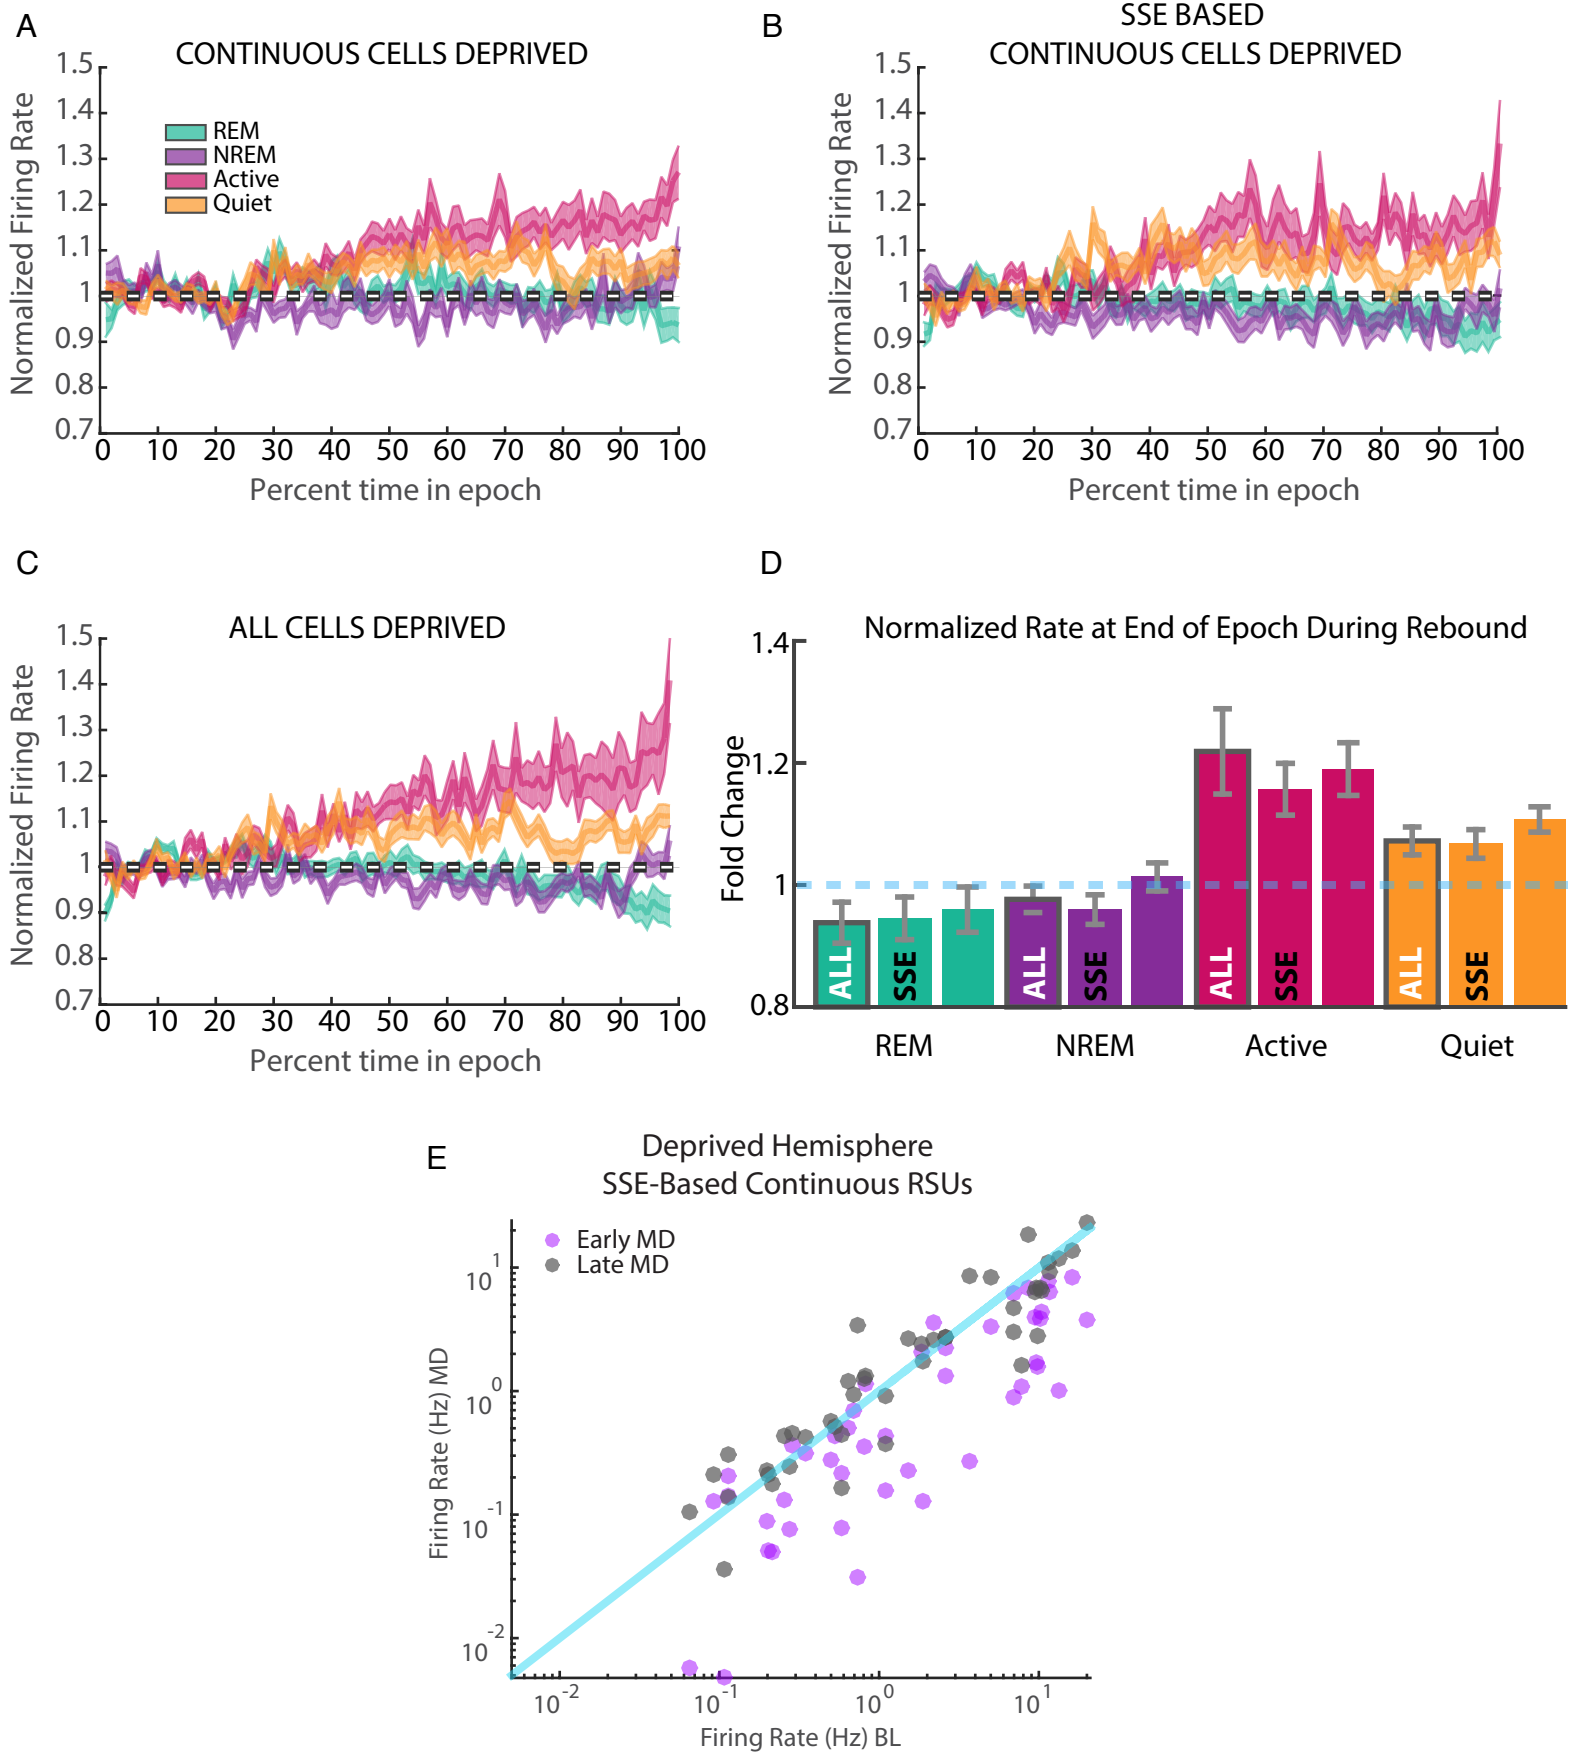

Figure S4

Supplement: NIHMS769601-supplement-4.pdf [file NIHMS769601-supplement-4.pdf]

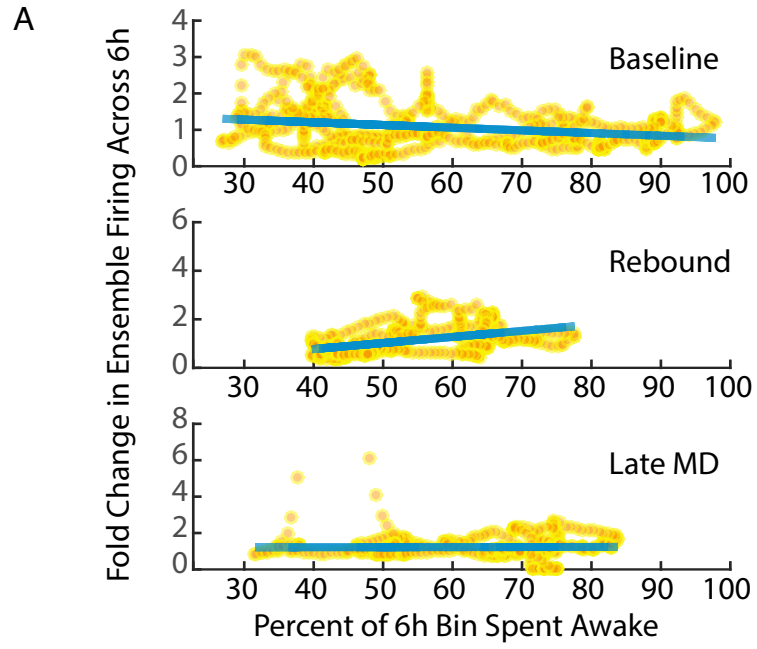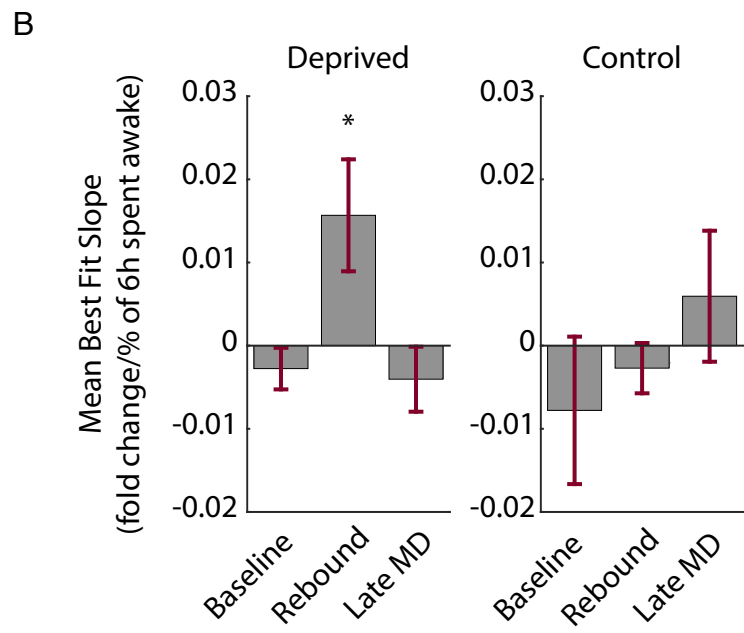

Figure S5

Supplement: NIHMS769601-supplement-5.pdf [file NIHMS769601-supplement-5.pdf]

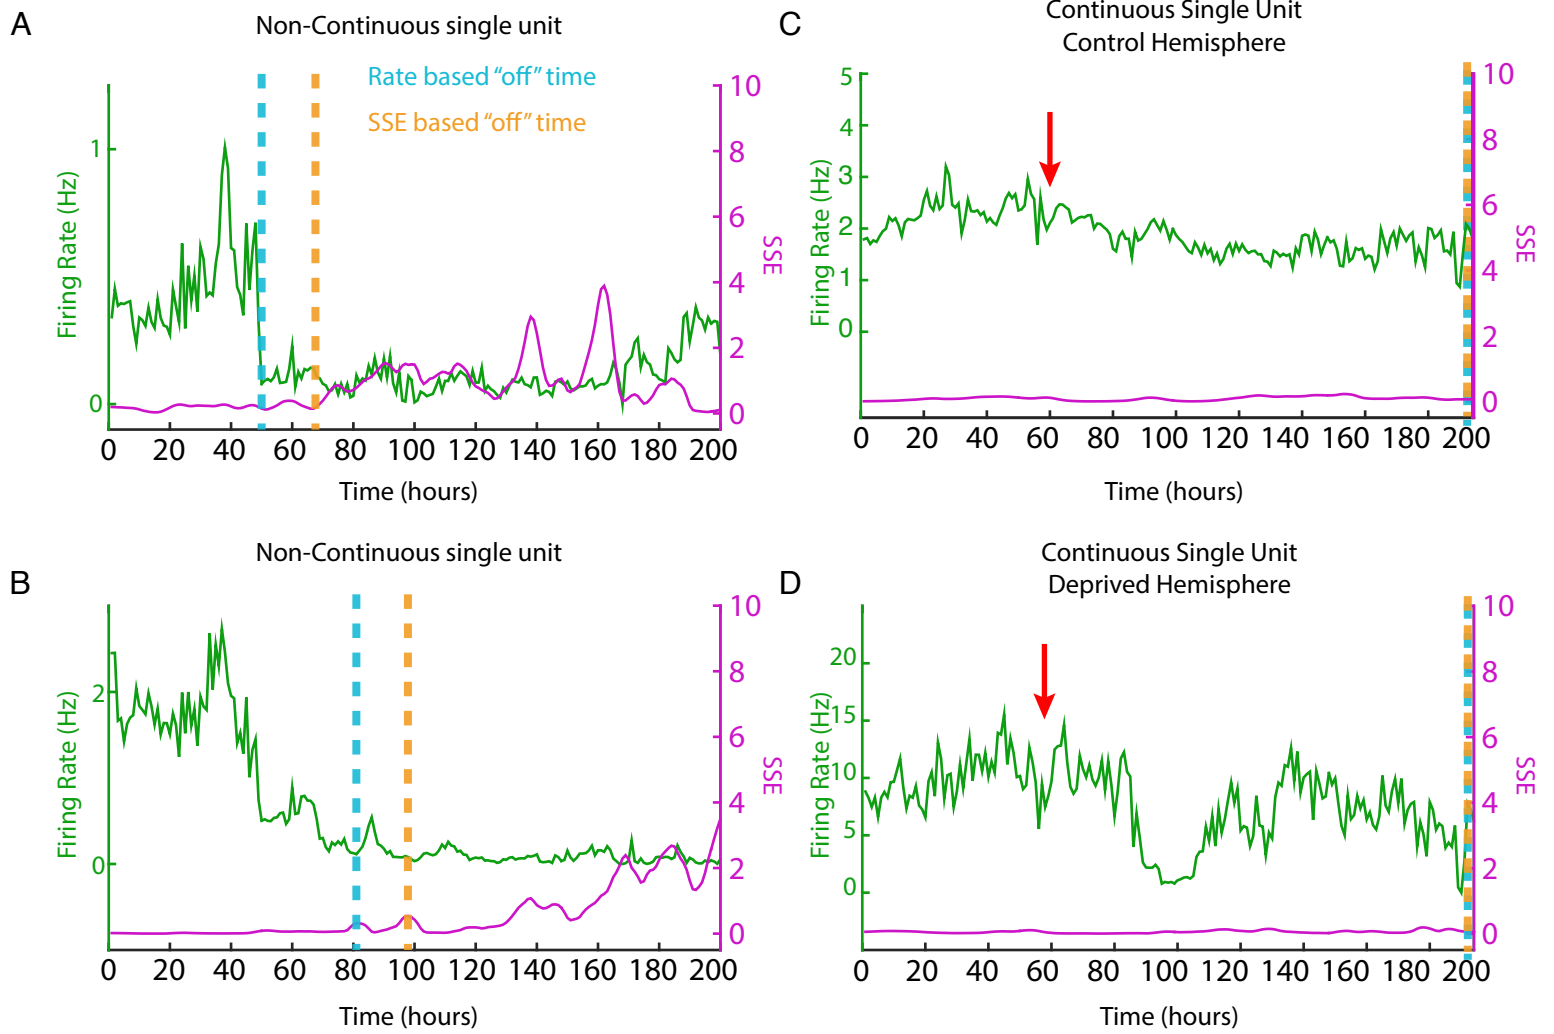

Figure S6

Supplement: NIHMS769601-supplement-6.pdf [file NIHMS769601-supplement-6.pdf]
